# Supplementary material
Source: Springer Nature journal article supplement (https://www.springermedizin.de/resource/supplementary/12885_2008_1532_MOESM10_ESM.pdf/9472252)

Additional file 10.

a

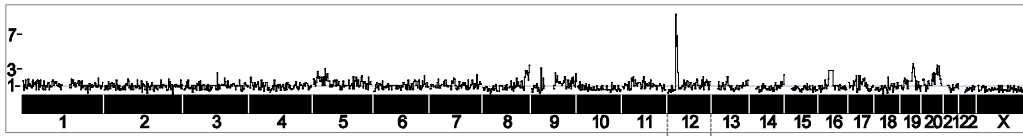

b

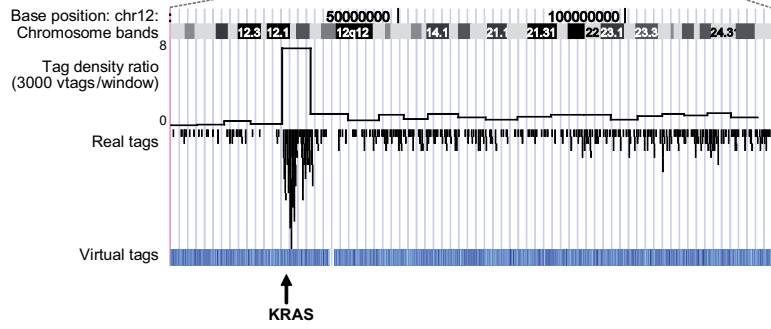

Supplement: MOESM10 [file 9472252]
